# Supplementary material for: Assessing the performance of genome-wide association studies for predicting disease risk
Source: PubMed Central journal article supplement (PMC6894795; doi:10.1371/journal.pone.0220215), 2019-12-05
Supplement: pone.0220215.s002.pdf [file pone.0220215.s002.pdf]

S2 Table

| Study Purpose                                       | AUROC       | PMID     |
|-----------------------------------------------------|-------------|----------|
| Crohn's Disease                                     | 0.75        | 28851283 |
| Alzheimer's Disease                                 | 0.68        | 28727176 |
| Alzheimer's Disease                                 | 0.67        | 26490334 |
| Skin Colour                                         | 0.73-0.97   | 28500464 |
| Pulmonary tuberculosis                              | 0.64        | 28355295 |
| Breast Cancer                                       | 0.64        | 28205043 |
| Obesity                                             | 0.57        | 23701538 |
| Esophageal Squamous-cell Carcinoma                  | 0.63        | 23536576 |
| Common Psoriasis                                    | 0.76        | 28537254 |
| Osteoporotic Fracture                               | 0.55        | 23572424 |
| 10 different conditions                             | 0.6-0.8     | 28065900 |
| Renal Cell Carcinoma                                | 0.66        | 27229762 |
| Alcohol Dependence                                  | 0.55        | 23362995 |
| Chronic Myelogenous Leukemia                        | 0.61        | 26474455 |
| Venous Thromboembolism                              | 0.66        | 25472531 |
| Alzheimer's Disease                                 | 0.64        | 26543236 |
| Leprosy                                             | 0.71        | 30231057 |
| Colorectal Cancer                                   | 0.59        | 29908285 |
| Head Hair Shape                                     | 0.664-0.789 | 30268682 |
| Celiac Disease                                      | 0.86-0.9    | 24550740 |
| Non-alcoholic Steatohepatitis                       | 0.65        | 29385134 |
| Type 2 Diabetes                                     | 0.64        | 24947790 |
| Prostate Cancer                                     | 0.60        | 27140652 |
| Crohn's Disease                                     | 0.78        | 27076762 |
| Lung Cancer                                         | 0.55        | 23228068 |
| Triple-Negative Breast Cancer                       | 0.94        | 28918577 |
| Psoriasis                                           | 0.78        | 28617847 |
| Obesity                                             | 0.73        | 23629956 |
| Trichloroethylene induced hypersensitivity syndrome | 0.81        | 26190474 |
| Bipolar Disorder                                    | 0.60        | 26178159 |
| Obesity in people with major depressive disorder    | 0.58        | 25903154 |
| Axial Spondyloarthritis                             | 0.83        | 27749235 |
| Crohn's Disease                                     | 0.73-0.97   | 28052082 |
| Straight Hair                                       | 0.69        | 26414620 |

|                                                                                               |           |          |
|-----------------------------------------------------------------------------------------------|-----------|----------|
| Nasopharyngeal Carcinoma                                                                      | 0.52      | 25180181 |
| IVF embryo transfer implantation failures                                                     | 0.75      | 28388872 |
| Cutaneous Melanoma                                                                            | 0.64      | 30060076 |
| Graves' Disease                                                                               | 0.70      | 30649410 |
| Age Related Macular Degeneration                                                              | 0.77      | 24576882 |
| Breast Cancer                                                                                 | 0.63      | 30554720 |
| Osteoporosis                                                                                  | 0.67      | 28580384 |
| Type 2 Diabetes                                                                               | 0.86      | 29099854 |
| Prostate Biopsy                                                                               | 0.61      | 24265090 |
| Breast Cancer                                                                                 | 0.57      | 18612136 |
| Type 2 Diabetes                                                                               | 0.64      | 23956346 |
| Multiple Sclerosis                                                                            | 0.69      | 22164203 |
| Breast Cancer                                                                                 | 0.59      | 29302764 |
| Non-small Cell Lung Cancer                                                                    | 0.50      | 23720679 |
| Non-melanoma Skin Cancer                                                                      | 0.66      | 30085400 |
| Ulcerative Colitis                                                                            | 0.86      | 24241240 |
| Alzheimer's Disease                                                                           | 0.70      | 26086184 |
| Rheumatoid Arthritis                                                                          | 0.79      | 20032229 |
| Rheumatoid Arthritis                                                                          | 0.66      | 24068971 |
| Prostate Cancer                                                                               | 0.60      | 26431041 |
| Prostate Biopsy                                                                               | 0.59      | 22652152 |
| Metabolic Syndrome                                                                            | 0.64      | 24198294 |
| Breast Cancer                                                                                 | 0.65      | 22269215 |
| Breast Cancer                                                                                 | 0.74      | 23354978 |
| Alzheimer's Disease                                                                           | 0.69      | 29784544 |
| Effect of Immunosuppressive Treatment in First Kidney Transplant                              | 0.69      | 27777962 |
| Myocardial Infarction                                                                         | 0.60      | 29340220 |
| Rheumatoid Arthritis                                                                          | 0.59      | 21980439 |
| Non-alcoholic Steatohepatitis                                                                 | 0.56      | 25597287 |
| Eye color                                                                                     | 0.6-0.889 | 27221533 |
| Breast Cancer                                                                                 | 0.59      | 25380502 |
| Predictors of treatment nonresponse to the first anti-TNF inhibitor in ankylosing spondylitis | 0.77      | 24337767 |
| Hair Color                                                                                    | 0.66-0.86 | 21197618 |
| Breast Cancer                                                                                 | 0.68      | 21212067 |
| Type 2 Diabetes                                                                               | 0.69      | 30767168 |
| Breast Cancer                                                                                 | 0.58      | 22314178 |
| Alzheimer's Disease                                                                           | 0.74      | 25720397 |

|                                                                              |           |          |
|------------------------------------------------------------------------------|-----------|----------|
| Type 1 Diabetes                                                              | 0.92      | 30655379 |
| Systemic Lupus Erythematosus                                                 | 0.71      | 29967481 |
| Prostate Cancer                                                              | 0.66      | 23071574 |
| Psoriasis                                                                    | 0.72      | 21559375 |
| Coronary Artery Disease                                                      | 0.6-0.8   | 20729558 |
| Breast Cancer                                                                | 0.60      | 22585702 |
| Major Depressive Disorder                                                    | <0.54     | 25279001 |
| Type 2 Diabetes Mellitus                                                     | 0.62      | 20384434 |
| Oral Malignancy                                                              | 0.61      | 30657779 |
| Rheumatoid Arthritis                                                         | 0.70      | 20309765 |
| Metastatic Colorectal Cancer                                                 | 0.88      | 25372392 |
| Elevated Liver Fat Content                                                   | 0.66      | 23804528 |
| Chronic Hepatitis C Therapy                                                  | 0.75      | 23615070 |
| Systemic Lupus Erythematosus                                                 | 0.76      | 26689915 |
| Type 1 Diabetes                                                              | 0.79      | 19956648 |
| Relapse in recipients of allogeneic haematopoietic stem cell transplantation | 0.72      | 30089915 |
| Breast Cancer                                                                | 0.65      | 27279675 |
| Carotid Atherosclerosis                                                      | 0.65      | 20941391 |
| Type 2 Diabetes                                                              | 0.60      | 18694974 |
| Glaucoma                                                                     | 0.62-0.94 | 30352225 |
| Type 2 Diabetes                                                              | 0.64      | 19197355 |
| Type 2 Diabetes                                                              | 0.63      | 20571754 |
| Breast cancer                                                                | 0.64      | 27565998 |
| Prostate Cancer                                                              | 0.66      | 28827750 |
| Colorectal Cancer                                                            | 0.56      | 28233817 |
| Stroke Risk                                                                  | 0.65      | 30073812 |
| Oral Cancer Recurrence                                                       | 0.64      | 28400480 |
| Breast Cancer                                                                | 0.58      | 22972951 |
| Multiple Sclerosis                                                           | 0.59      | 23903824 |
| Type 1 Diabetes                                                              | 0.88      | 26577414 |
| Type 2 Diabetes                                                              | 0.58      | 17020404 |
| Type 2 Diabetes                                                              | 0.60      | 18591388 |
| Type 2 Diabetes                                                              | 0.63      | 19247372 |
| Type 2 Diabetes                                                              | 0.60      | 19404609 |
| Type 2 Diabetes                                                              | 0.62      | 19862325 |
| Colorectal Cancer                                                            | 0.57      | 22490517 |
| Age Related Macular Degeneration                                             | 0.82      | 22666427 |
| Crohn's Disease                                                              | 0.71      | 21548950 |

|                                  |      |          |
|----------------------------------|------|----------|
| Prostate Cancer                  | 0.61 | 20620408 |
| Age Related Macular Degeneration | 0.73 | 18596911 |
| Age Related Macular Degeneration | 0.77 | 19825847 |
