# Supplementary material for: Assessing the performance of genome-wide association studies for predicting disease risk
Source: PubMed Central journal article supplement (PMC6894795; doi:10.1371/journal.pone.0220215), 2019-12-05
Supplement: pone.0220215.s003.pdf [file pone.0220215.s003.pdf]

S3 Table

| Number of SNPs | Number of Studies<br>in GWAS Central |
|----------------|--------------------------------------|
| 1              | 165                                  |
| 2              | 78                                   |
| 3              | 64                                   |
| 4              | 54                                   |
| 5              | 37                                   |
| 6              | 31                                   |
| 7              | 19                                   |
| 8              | 21                                   |
| 9              | 15                                   |
| 10             | 20                                   |
| 11             | 3                                    |
| 12             | 4                                    |
| 13             | 4                                    |
| 14             | 7                                    |
| 15             | 3                                    |
| 16             | 4                                    |
| 17             | 4                                    |
| 18             | 1                                    |
| 19             | 1                                    |
| 20             | 2                                    |
| 21             | 2                                    |
| 23             | 4                                    |
| 25             | 1                                    |
| 26             | 1                                    |
| 27             | 1                                    |
| 28             | 1                                    |
| 29             | 3                                    |
| 30             | 3                                    |
| 32             | 2                                    |
| 34             | 2                                    |
| 36             | 2                                    |
| 37             | 1                                    |
| 38             | 1                                    |
| 40             | 1                                    |
| 44             | 1                                    |

50

6
