# Supplementary material for: Assessing the performance of genome-wide association studies for predicting disease risk
Source: PubMed Central journal article supplement (PMC6894795; doi:10.1371/journal.pone.0220215), 2019-12-05
Supplement: pone.0220215.s004.pdf [file pone.0220215.s004.pdf]

S4 Table

| Phenotype/Condition                                   | AUROC |
|-------------------------------------------------------|-------|
| Black vs. non-black hair color                        | 0.97  |
| Celiac disease                                        | 0.84  |
| Dupuytren's disease                                   | 0.75  |
| Age-related macular degeneration                      | 0.75  |
| Progressive supranuclear palsy                        | 0.71  |
| Heart failure                                         | 0.66  |
| Testicular germ cell cancer                           | 0.65  |
| Inflammatory bowel disease                            | 0.64  |
| Autoimmune hepatitis type-1                           | 0.63  |
| Chronic hepatitis B infection                         | 0.63  |
| Brugada syndrome                                      | 0.63  |
| Blond vs. brown hair color                            | 0.63  |
| Atrial fibrillation                                   | 0.62  |
| Disease-free survival in breast cancer                | 0.62  |
| Taxane-induced peripheral neuropathy in breast cancer | 0.62  |
| Crohn's disease                                       | 0.62  |
| Systemic lupus erythematosus                          | 0.61  |
| Craniofacial microsomia                               | 0.61  |
| Paget's disease of bone                               | 0.61  |
| Leprosy                                               | 0.61  |
| Hypertriglyceridemia                                  | 0.61  |
| Nasopharyngeal carcinoma                              | 0.61  |
| Anti-dsDNA status                                     | 0.61  |
| Interstitial lung disease                             | 0.60  |
| Male-pattern baldness                                 | 0.60  |
| Late onset Alzheimer's disease                        | 0.60  |
| Chronic lymphocytic leukemia                          | 0.60  |
| Hepatitis B                                           | 0.60  |
| Ulcerative colitis                                    | 0.60  |
| Venous thromboembolism                                | 0.59  |
| Graves disease                                        | 0.59  |
| Psoriasis                                             | 0.59  |
| Sjogren's syndrome                                    | 0.59  |
| Hodgkin's lymphoma                                    | 0.59  |
| Infantile hypertrophic pyloric stenosis               | 0.59  |

|                                                     |      |
|-----------------------------------------------------|------|
| Primary biliary cholangitis                         | 0.59 |
| Restless legs syndrome                              | 0.58 |
| Insomnia (caffeine-induced)                         | 0.58 |
| Renal gout                                          | 0.58 |
| Burning and freckling                               | 0.58 |
| High serum lipase activity                          | 0.58 |
| Prostate cancer                                     | 0.57 |
| Kawasaki disease                                    | 0.57 |
| Idiopathic pulmonary fibrosis                       | 0.57 |
| Dementia with Lewy bodies                           | 0.57 |
| Febrile seizures                                    | 0.57 |
| Goiter                                              | 0.57 |
| Sporadic neuroblastoma                              | 0.57 |
| Gout                                                | 0.57 |
| Polycystic ovary syndrome                           | 0.57 |
| Early-onset obesity                                 | 0.56 |
| Multiple sclerosis                                  | 0.56 |
| Corneal astigmatism                                 | 0.56 |
| Psoriatic arthritis                                 | 0.56 |
| Immunoglobulin light chain (AL) amyloidosis         | 0.56 |
| Nonsyndromic cleft lip with or without cleft palate | 0.56 |
| Blond vs non-blond hair color                       | 0.56 |
| Supraventricular ectopy                             | 0.56 |
| Major depressive disorder                           | 0.56 |
| Ewing sarcoma                                       | 0.56 |
| Glioma                                              | 0.56 |
| Acute-on-chronic liver failure in hepatitis B       | 0.56 |
| Bronchopulmonary dysplasia                          | 0.56 |
| Pancreatitis                                        | 0.56 |
| Myocardial infarction                               | 0.56 |
| Migraine                                            | 0.56 |
| End-stage renal disease in Type 1 diabetics (Women) | 0.56 |
| Case-only systemic lupus erythematosus              | 0.56 |
| Thyroid cancer                                      | 0.56 |
| Hepatitis C induced liver cirrhosis                 | 0.55 |
| Wilms tumor                                         | 0.55 |
| Gallbladder cancer                                  | 0.55 |
| Light vs. dark hair color                           | 0.55 |
| Follicular lymphoma                                 | 0.55 |

|                                                                  |      |
|------------------------------------------------------------------|------|
| Aggressive periodontitis                                         | 0.55 |
| Acute lymphoblastic leukemia (childhood)                         | 0.55 |
| Survival in breast cancer                                        | 0.55 |
| Adolescent idiopathic scoliosis                                  | 0.55 |
| Multiple myeloma                                                 | 0.55 |
| Myeloproliferative neoplasms                                     | 0.55 |
| Freckles                                                         | 0.55 |
| Brown vs. non-brown hair color                                   | 0.55 |
| Lung adenocarcinoma                                              | 0.55 |
| Ossification of the posterior longitudinal ligament of the spine | 0.55 |
| Systemic sclerosis                                               | 0.55 |
| Primary sclerosing cholangitis                                   | 0.54 |
| Parkinson's disease                                              | 0.54 |
| Creutzfeldt-Jakob disease                                        | 0.54 |
| Obesity                                                          | 0.54 |
| Response to Dalcetrapib treatment in acute coronary syndrome     | 0.54 |
| Leishmaniasis (visceral)                                         | 0.54 |
| Narcolepsy                                                       | 0.54 |
| Marginal zone lymphoma                                           | 0.54 |
| Melanoma                                                         | 0.54 |
| Rheumatoid arthritis                                             | 0.54 |
| Vitiligo                                                         | 0.54 |
| Diffuse large B cell lymphoma                                    | 0.54 |
| Myopic maculopathy                                               | 0.54 |
| Acne (severe)                                                    | 0.54 |
| Non-small cell lung cancer                                       | 0.54 |
| Helicobacter pylori serologic status                             | 0.54 |
| Epithelial ovarian cancer                                        | 0.54 |
| Mucinous ovarian carcinoma                                       | 0.54 |
| Abdominal aortic aneurysm                                        | 0.54 |
| Myopia (pathological)                                            | 0.54 |
| Allergic sensitization                                           | 0.54 |
| Ovarian cancer                                                   | 0.54 |
| Red vs. non-red hair color                                       | 0.54 |
| Skin sensitivity to sun                                          | 0.54 |
| B cell non-Hodgkin lymphoma                                      | 0.54 |
| Amyotrophic lateral sclerosis                                    | 0.54 |
| Mortality in heart failure                                       | 0.54 |

|                                                             |      |
|-------------------------------------------------------------|------|
| Cholangiocarcinoma in primary sclerosing cholangitis        | 0.54 |
| Meningioma                                                  | 0.54 |
| Aortic valve stenosis                                       | 0.53 |
| Cleft lip                                                   | 0.53 |
| Allergic disease                                            | 0.53 |
| Endometrial cancer                                          | 0.53 |
| Anorexia nervosa                                            | 0.53 |
| Diabetic nephropathy                                        | 0.53 |
| Response to metformin                                       | 0.53 |
| Neuroblastoma                                               | 0.53 |
| Periodontitis                                               | 0.53 |
| Fractures (vertebral)                                       | 0.53 |
| Mitral valve prolapse                                       | 0.53 |
| Scoliosis                                                   | 0.53 |
| Mesial temporal lobe epilepsy                               | 0.53 |
| Chronic bronchitis in chronic obstructive pulmonary disease | 0.53 |
| Susceptibility to persistent hepatitis B virus infection    | 0.53 |
| Digestive system disease                                    | 0.53 |
| Early onset inflammatory bowel disease                      | 0.53 |
| Chronic hepatitis C infection                               | 0.53 |
| Autism                                                      | 0.53 |
| Gastric cancer                                              | 0.53 |
| Sporadic pituitary adenoma                                  | 0.53 |
| Irritable bowel syndrome                                    | 0.53 |
| Calcific aortic valve stenosis                              | 0.53 |
| Longevity                                                   | 0.52 |
| Coronary artery disease                                     | 0.52 |
| Sclerosing cholangitis and ulcerative colitis (combined)    | 0.52 |
| Cardiac repolarization                                      | 0.52 |
| Type 2 diabetes                                             | 0.52 |
| Breast cancer                                               | 0.52 |
| Pulmonary artery enlargement                                | 0.52 |
| Epilepsy                                                    | 0.52 |
| Alzheimer's disease                                         | 0.52 |
| Behcet's disease                                            | 0.52 |
| Knee osteoarthritis                                         | 0.52 |
| Urinary bladder cancer                                      | 0.52 |
| Type 1 diabetes                                             | 0.52 |
| Rhegmatogenous retinal detachment                           | 0.52 |

|                                                      |      |
|------------------------------------------------------|------|
| Non-cardia gastric cancer                            | 0.52 |
| Bipolar disorder                                     | 0.52 |
| Hepatocellular carcinoma                             | 0.52 |
| Intracranial aneurysm                                | 0.52 |
| Squamous cell carcinoma                              | 0.52 |
| Primary open-angle glaucoma                          | 0.52 |
| Morning vs. evening chronotype                       | 0.52 |
| Cardia gastric cancer                                | 0.52 |
| Congenital heart malformation                        | 0.52 |
| Pancreatic cancer                                    | 0.52 |
| Inguinal hernia                                      | 0.52 |
| Osteoporosis                                         | 0.52 |
| Hypertension                                         | 0.52 |
| Esophageal cancer                                    | 0.52 |
| Endometriosis                                        | 0.52 |
| Uterine fibroids                                     | 0.52 |
| Disc degeneration (lumbar)                           | 0.52 |
| Chronic obstructive pulmonary disease                | 0.52 |
| Cervical cancer                                      | 0.52 |
| Combined Crohn's disease and sarcoidosis             | 0.52 |
| Peripheral artery disease                            | 0.52 |
| Sarcoidosis                                          | 0.52 |
| Diarrhoeal Disease                                   | 0.52 |
| Anxiety disorder                                     | 0.52 |
| Intracerebral hemorrhage                             | 0.52 |
| Atopic dermatitis                                    | 0.52 |
| Glaucoma                                             | 0.52 |
| Hyperemesis gravidarum                               | 0.52 |
| Survival in colorectal cancer                        | 0.52 |
| Type 1 diabetes nephropathy                          | 0.52 |
| Pain                                                 | 0.51 |
| Basal cell carcinoma                                 | 0.51 |
| Upper aerodigestive tract cancers                    | 0.51 |
| Tuberculosis                                         | 0.51 |
| Renal cell carcinoma                                 | 0.51 |
| Curve progression in adolescent idiopathic scoliosis | 0.51 |
| Sudden cardiac arrest                                | 0.51 |
| Drinking behavior                                    | 0.51 |
| Blue vs. green eyes                                  | 0.51 |

|                                                         |      |
|---------------------------------------------------------|------|
| Major mood disorders                                    | 0.51 |
| Barrett's esophagus                                     | 0.51 |
| Drug abuse                                              | 0.51 |
| Asthma                                                  | 0.51 |
| Pathological myopia                                     | 0.51 |
| Cardiovascular disease risk factor                      | 0.51 |
| Arthritis (juvenile idiopathic)                         | 0.51 |
| Multiple cancers                                        | 0.51 |
| Smoking behavior                                        | 0.51 |
| Lung cancer                                             | 0.51 |
| Schizophrenia                                           | 0.51 |
| Meningococcal disease                                   | 0.51 |
| Red vs non-red hair color                               | 0.51 |
| Epstein Barr virus nuclear antigen 1 IgG seropositivity | 0.50 |
| Viral capsid antigen IgG seropositivity                 | 0.50 |
| Sasang constitutional medicine type (So-Eum)            | 0.50 |
| Kidney disease                                          | 0.50 |
| Kidney stones                                           | 0.50 |
| Plantar fascial disorders                               | 0.50 |
| Shingles                                                | 0.50 |
| Colon cancer                                            | 0.50 |
| Carotid intima media thickness, plaque                  | 0.50 |
| Enteric fever                                           | 0.50 |
| Colorectal cancer                                       | 0.50 |
| Chronic kidney disease                                  | 0.50 |
| Bladder cancer                                          | 0.50 |
| Ischemic stroke                                         | 0.50 |
| Stroke                                                  | 0.49 |
| Osteoarthritis                                          | 0.47 |
